# Supplementary material for: A Scoping Review of Measurement Tools Evaluating Awareness and Disease-Related Knowledge in Peripheral Arterial Disease Patients
Source: MDPI journal article supplement (doi:10.3390/jcm13010107), 2023-12-24
Supplement: s1 [file s1]

## Supplementary Files

### S1. Search Strategy

Peripheral Artery Disease & Knowledge/Awareness Information

Search Strategy: Ovid MEDLINE(R) ALL <1946 to January 05, 2023>

- 
- 1 [Population: Peripheral Artery Disease]
  - 2 exp Peripheral Arterial Disease/ (10891)
  - 3 Intermittent Claudication/ (8371)
  - 4 (peripheral arter\* adj3 (obstructi\* or obliterati\* or occlusi\* or disease)).tw,kw.  
(19596)
  - 5 (limb\* adj3 (ischemia or ischaemia)).tw,kw. (12633)
  - 6 (intermittent adj3 claudication).tw,kw. (5488)
  - 7 or/2-6 (40307)
  - 8 [Outcomes: Knowledge/Awareness-Related Information]
  - 9 Patient Education as Topic/ (88167)
  - 10 Health Knowledge, Attitudes, Practice/ (125338)
  - 11 health education/ (63306)
  - 12 exp consumer health information/ (12859)
  - 13 health promotion/ (80495)
  - 14 Awareness/ (21694)
  - 15 exp "Surveys and Questionnaires"/ (1193443)
  - 16 ((educat\* or knowledg\* or aware\* or unaware\* or inform\* or survey\* or  
questionnaire\* or tool\* or instrument\* or inventor\*) adj5 (peripheral arter\* disease\*  
or PAD)).tw,kw. (959)
  - 17 (((understand\* or familiar\*) adj4 (patient\* or public)) and (peripheral arter\* or  
PAD)).tw,kw. (58)
  - 18 (consequen\* adj4 (PAD or peripheral arter\*)).tw,kw. (105)
  - 19 ((interview\* adj3 data) and (peripheral arter\* disease\* or PAD)).tw,kw. (10)
  - 20 or/9-19 (1456225)

- 21 7 and 20 (3535)
- 22 limit 21 to "humans only (removes records about animals)" (3511)
- 23 remove duplicates from 22 (3510)
- 24 23 not (Letter or Editorial or News).pt. (3424)

\*\*\*\*\*

**S2. Description of the quality of the analyzed instruments evaluated by the Mixed-Methods Assessment Tool (MMAT)**

| <b>Author (Year)</b> | <b>Q1</b> | <b>Q2</b> | <b>Q3</b> | <b>Q4</b> | <b>Q5</b> | <b>Total/5</b> |
|----------------------|-----------|-----------|-----------|-----------|-----------|----------------|
| Gorely (2015)        | Yes       | Yes       | Yes       | Yes       | Yes       | 5              |
| Wann-Hansson (2016)  | Yes       | Yes       | Yes       | Yes       | Yes       | 5              |
| Lokin (2015)         | Yes       | Yes       | Yes       | Yes       | Yes       | 5              |
| Keelan (2021)        | Yes       | No        | Yes       | No        | Yes       | 3              |
| Byskosh (2022)       | Yes       | No        | Yes       | No        | Yes       | 3              |
| Udelnow (2020)       | Yes       | No        | No        | Yes       | Yes       | 3              |
| Bolt (2020)          | Yes       | No        | No        | No        | Yes       | 2              |
| Builyte (2019)       | Yes       | No        | Yes       | Yes       | Yes       | 4              |
| El Jang (2018)       | Yes       | No        | No        | Yes       | Yes       | 3              |
| Provance (2018)      | Unclear   | Unclear   | Unclear   | Unclear   | Unclear   | 0              |
| Martinez (2017)      | Yes       | No        | No        | Yes       | Yes       | 3              |
| Vasaroangrong (2016) | Yes       | No        | No        | No        | Yes       | 2              |
| Owens (2013)         | Unclear   | Unclear   | Unclear   | Unclear   | Unclear   | 0              |
| Coughlin (2007)      | Yes       | Yes       | No        | No        | Yes       | 3              |
| Willigendael (2004)  | Yes       | No        | Yes       | No        | Yes       | 3              |
| McDermott (2003)     | Yes       | No        | No        | No        | Yes       | 2              |

### S3. Description of the knowledge and awareness evaluated in the instruments identified

| Main knowledge topic | Subtopic | Studies assessing knowledge about the topic | Percentage of study participants that reported having knowledge/awareness about the specific topic | Code |
|----------------------|----------|---------------------------------------------|----------------------------------------------------------------------------------------------------|------|
| Risk factor for PAD  | Diabetes | Byskosh (2022)                              | 63.2%                                                                                              | +++  |
|                      |          | Keelan (2021)                               | 61.0%                                                                                              | +++  |
|                      |          | Owens (2013)                                | 21.6%                                                                                              | +    |
|                      |          | Coughlin (2007)                             | 14.0%                                                                                              | +    |
|                      |          | Willigendael (2004)                         | 8.0%                                                                                               | +    |
|                      | Smoking  | Keelan (2021)                               | 86.0%                                                                                              | ++++ |
|                      |          | Lokin (2015)                                | 79.0%                                                                                              | ++++ |
|                      |          | Byskosh (2022)                              | 74.3%                                                                                              | +++  |
|                      |          | Owens (2013)                                | 62.9%                                                                                              | +++  |
|                      |          | Coughlin (2007)                             | 57.0%                                                                                              | +++  |
|                      |          | Willigendael (2004)                         | 52.0%                                                                                              | +++  |
|                      |          | Gorely (2015)                               | Widespread awareness that smoking is a risk factor for PAD                                         | 00   |

|  |                      |                     |                                                                               |      |
|--|----------------------|---------------------|-------------------------------------------------------------------------------|------|
|  |                      | Wann-Hansson (2016) | Smoking triggered feelings of guilt and ambivalence due to its harmful effect | 00   |
|  | Physical inactivity  | Byskosh (2022)      | 75.7%                                                                         | ++++ |
|  |                      | Keelan (2021)       | 73.0%                                                                         | +++  |
|  |                      | Willigendael (2004) | 23%                                                                           | +    |
|  |                      | Gorely (2015)       | Uncertain about lack of exercise as a risk factor for PAD                     | 0    |
|  | Hypertension         | Keelan (2021)       | 69.0%                                                                         | +++  |
|  |                      | Byskosh (2022)      | 64.8%                                                                         | +++  |
|  |                      | Owens (2013)        | 26.0%                                                                         | ++   |
|  |                      | Coughlin (2007)     | 11.4%                                                                         | +    |
|  | Hypercholesterolemia | Keelan (2021)       | 73.0%                                                                         | +++  |
|  |                      | Byskosh (2022)      | 70.5%                                                                         | +++  |
|  |                      | Owens (2013)        | 30.0%                                                                         | ++   |
|  |                      | Coughlin (2007)     | 17.0%                                                                         | +    |
|  |                      | Willigendael (2004) | 12.0%                                                                         | +    |
|  | Overweight           | Keelan (2021)       | 71.0%                                                                         | +++  |
|  |                      | Byskosh (2022)      | 55.2%                                                                         | +++  |

|                       |                           |                      |                                                    |      |
|-----------------------|---------------------------|----------------------|----------------------------------------------------|------|
|                       |                           | Gorely (2015)        | Recognized as a risk factor                        | 00   |
|                       | Age                       | Owens (2013)         | 21.7%                                              | +    |
|                       |                           | Willigendael (2004)  | 4.0%                                               | +    |
|                       |                           | Gorely (2015)        | Recognized as a risk factor                        | 00   |
|                       | Family history            | Keelan (2021)        | 65.0%                                              | +++  |
|                       |                           | Byskosh (2022)       | 36.8%                                              | ++   |
|                       |                           | Gorely (2015)        | Recognized as a risk factor                        | 00   |
|                       | Overall                   | Martinez (2017)      | 66.8%                                              | +++  |
| Signs/Symptoms of PAD | Intermittent Claudication | Martinez (2017)      | 47.1%                                              | ++   |
|                       |                           | Lokin (2015)         | 21.0%                                              | +    |
|                       |                           | Gorely (2015)        | Many were unsure what is intermittent claudication | 0    |
|                       |                           | Wann-Hansson (2016)  | Unaware of symptoms                                | 0    |
|                       | Overall symptoms          | Vasaroangrong (2016) | Knowledge 'quite low'                              | 0    |
| PAD Consequences      | Amputation                | Builyte (2019)       | 91.0%                                              | ++++ |
|                       |                           | Keelan (2021)        | 78.0%                                              | +++  |
|                       |                           | Byskosh (2022)       | 73.2%                                              | ++   |

|  |                                            |                     |       |      |
|--|--------------------------------------------|---------------------|-------|------|
|  | Leg pain                                   | Builyte (2019)      | 87.0% | +++  |
|  |                                            | Byskosh (2022)      | 85.7% | ++++ |
|  | Stroke                                     | Builyte (2019)      | 71.0% | +++  |
|  |                                            | Byskosh (2022)      | 65.1% | +++  |
|  |                                            | Owens (2013)        | 58.8% | +++  |
|  |                                            | Keelan (2021)       | 55.0% | +++  |
|  |                                            | McDermott (2003)    | 28.7% | ++   |
|  | Coronary Artery<br>Disease/Heart<br>attack | Willigendael (2004) | 77.0% | ++++ |
|  |                                            | Builyte (2019)      | 71.0% | +++  |
|  |                                            | Byskosh (2022)      | 65.7% | +++  |
|  |                                            | Keelan (2021)       | 59.0% | +++  |
|  |                                            | Owens (2013)        | 58.8% | +++  |
|  | Death                                      | Builyte (2019)      | 84.0% | ++++ |
|  |                                            | Byskosh (2022)      | 63.1% | +++  |
|  |                                            | Keelan (2021)       | 55.0% | +++  |
|  |                                            | McDermott (2003)    | 26.6% | ++   |
|  | Inability to walk                          | Byskosh (2022)      | 85.7% | ++++ |

|                        |                                     |                      |                                                                              |      |
|------------------------|-------------------------------------|----------------------|------------------------------------------------------------------------------|------|
|                        |                                     | Builyte (2019)       | 84.0%                                                                        | ++++ |
|                        |                                     | Keelan (2021)        | 80.0%                                                                        | ++++ |
|                        | Ulcers                              | Builyte (2019)       | 76.0%                                                                        | ++++ |
|                        | Overall                             | Udelnow (2020)       | A minority of the patients remembered possible minor and major complications | 0    |
|                        |                                     | Vasaroangrong (2016) | Knowledge 'quite low'                                                        | 0    |
| Pathophysiology of PAD | What PAD is                         | Keelan (2021)        | 32.0%                                                                        | ++   |
|                        |                                     | Gorely (2015)        | Unable to define PAD                                                         | 0    |
|                        | Diagnosis                           | Byskosh (2022)       | 64.2%                                                                        | +++  |
|                        |                                     | Udelnow (2020)       | A minority of the patients remembered the diagnosis                          | 0    |
|                        | PAD concerns circulatory system     | Owens (2013)         | 26.0%                                                                        | ++   |
|                        |                                     | Willigendael (2004)  | 21.0%                                                                        | +    |
|                        | Overall knowledge about the disease | Martinez (2017)      | 60.5%                                                                        | +++  |
|                        |                                     | Vasaroangrong (2016) | Quite low                                                                    | 0    |
| Management of PAD      |                                     | Provance (2018)      | 81.0%                                                                        | +++  |



|                         |                                                           |                     |                                                                                                                                          |      |
|-------------------------|-----------------------------------------------------------|---------------------|------------------------------------------------------------------------------------------------------------------------------------------|------|
|                         | Manage PAD for the rest of their lives/ lifestyle changes | Martinez (2017)     | 57.2%                                                                                                                                    | +++  |
|                         |                                                           | Willigendael (2004) | 13.0%                                                                                                                                    | +    |
|                         |                                                           | Gorely (2015)       | Most participants were aware that there were things they could do themselves to help manage their condition, but with little specificity | 00   |
|                         | Physical activity                                         | Willigendael (2004) | 48.0%                                                                                                                                    | ++   |
|                         |                                                           | Owens (2013)        | 35.0%                                                                                                                                    | ++   |
|                         |                                                           | Gorely (2015)       | Uncertain about benefits                                                                                                                 | 0    |
|                         | Diet                                                      | Willigendael (2004) | 32.0%                                                                                                                                    | ++   |
|                         |                                                           | Owens (2013)        | 10.0%                                                                                                                                    | +    |
|                         | Smoking cessation                                         | Willigendael (2004) | 30.0%                                                                                                                                    | ++   |
|                         |                                                           | Owens (2013)        | 24.0%                                                                                                                                    | +    |
|                         |                                                           | Provance (2018)     | 20.0%                                                                                                                                    | +    |
| Pharmacological Therapy | Cholesterol-lowering and antiplatelet therapy             | McDermott (2003)    | 75.8%                                                                                                                                    | ++++ |

|  |                      |                     |       |     |
|--|----------------------|---------------------|-------|-----|
|  | Medication treatment | Willigendael (2004) | 12.0% | +   |
|  |                      | Owens (2013)        | 4.0%  | +   |
|  | Overall              | Martinez (2017)     | 65.0% | +++ |

Legend: PAD = peripheral arterial disease; 0 = no knowledge (but % not reported); 00 = some knowledge (but % not reported); + = 0-25% of participants reported knowing about this topic; ++ = 26-50% of participants reported knowing about this topic; +++ = 51-75% of participants reported knowing about this topic; ++++ = > 75% of participants reported knowing about this topic
